# Supplementary material for: Engineering Inflammation‐Resistant Cartilage: Bridging Gene Therapy and Tissue Engineering
Source: PubMed Central journal article supplement — Adv Healthc Mater. 2023 Mar 15;12(17):2202271. doi: 10.1002/adhm.202202271 (PMC11468558; doi:10.1002/adhm.202202271), 2023-03-15
Supplement: ADHM-12-2202271-s001.pdf [file ADHM-12-2202271-s001.pdf]

# ADVANCED HEALTHCARE MATERIALS

## Supporting Information

for *Adv. Healthcare Mater.*, DOI 10.1002/adhm.202202271

Engineering Inflammation-Resistant Cartilage: Bridging Gene Therapy and Tissue Engineering

*Angela Bonato, Philipp Fisch, Simone Ponta, David Fercher, Mikko Manninen, Daniel Weber, Kari K. Eklund, Goncalo Barreto\* and Marcy Zenobi-Wong\**

# Supporting Information

## Supplementary figures

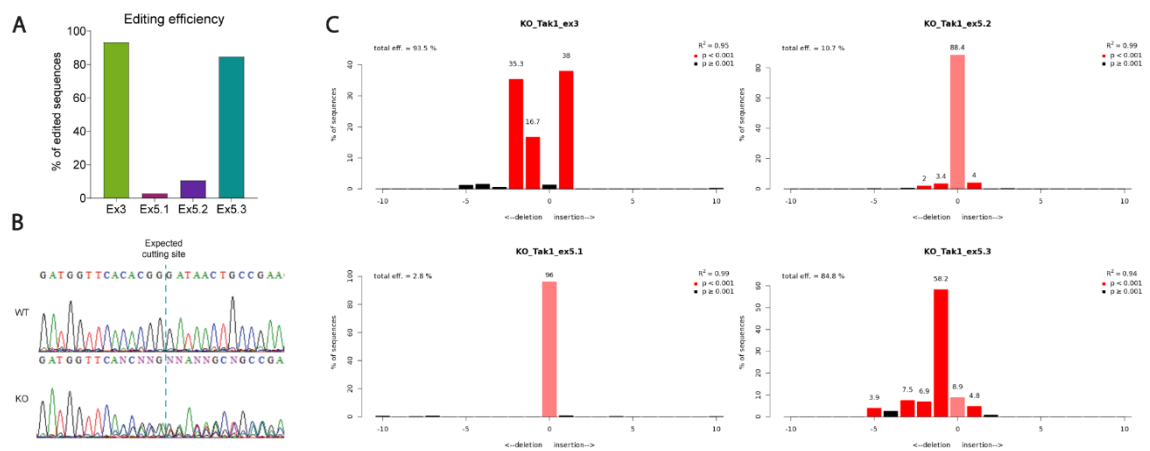

**Figure S1. Sanger sequencing of KO performed with different guide RNAs. (A)** Indels analysis of 4 different guide RNAs, **(B)** Sanger sequencing of a representative WT and KO sequence, with marking on expected cutting site. **(C)** Indel analysis performed with Tide.

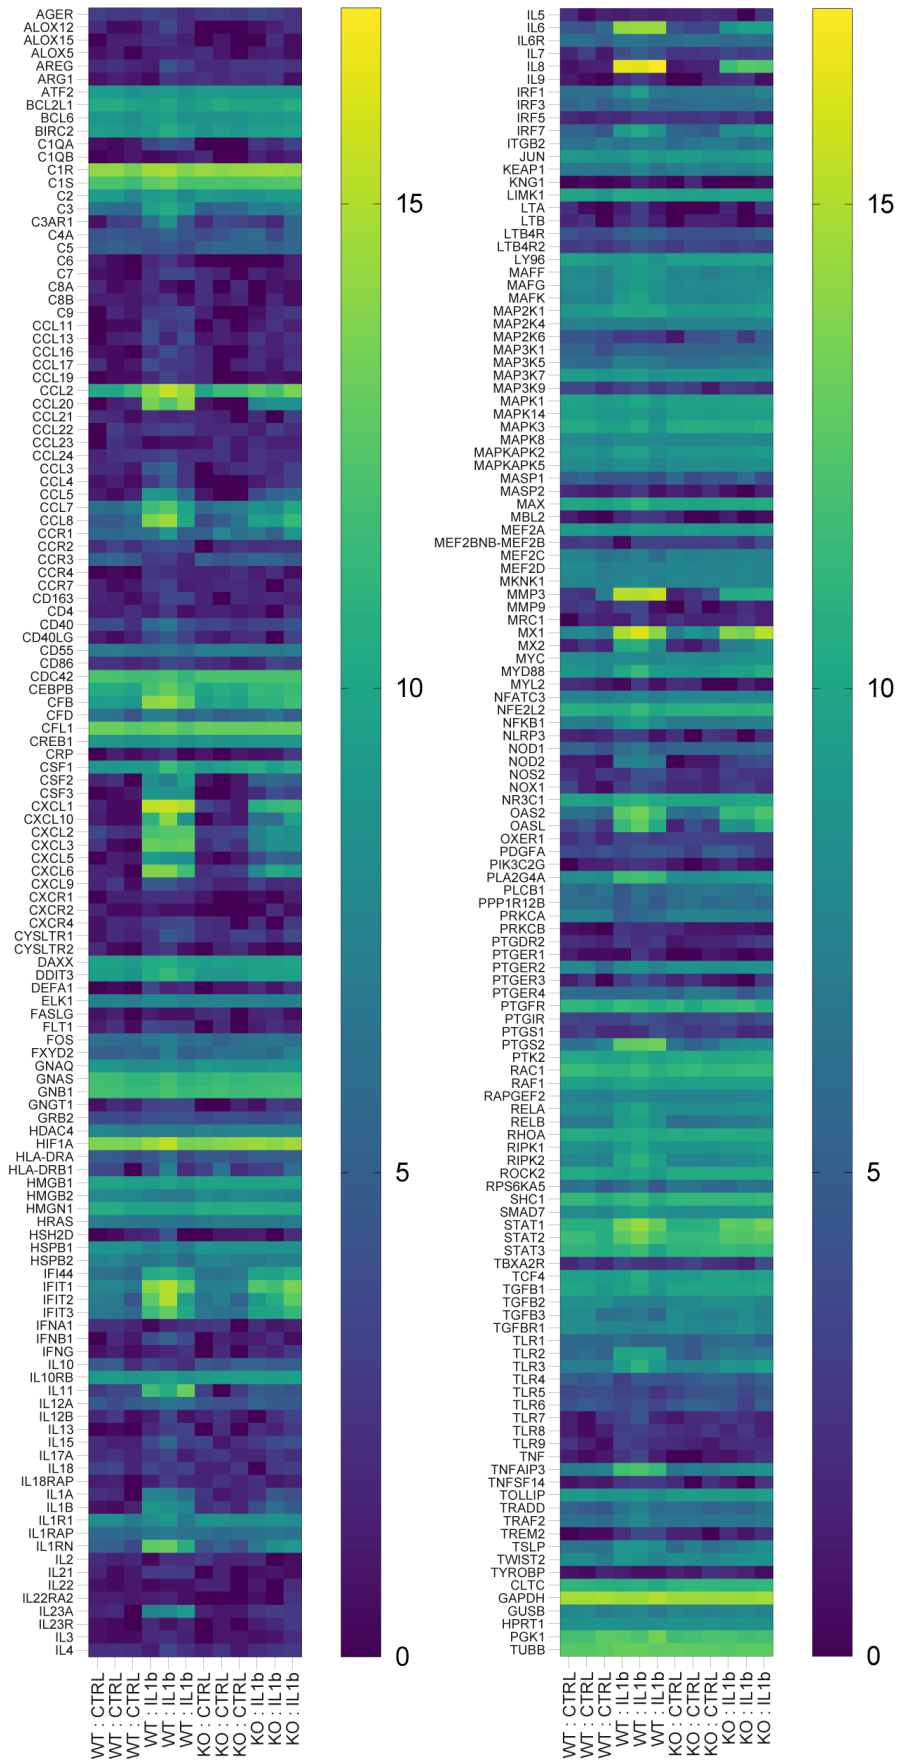

**Figure S2.** Heatmap of expressed genes by WT and KO samples, with or without IL-1 $\beta$  treatment (n=3).

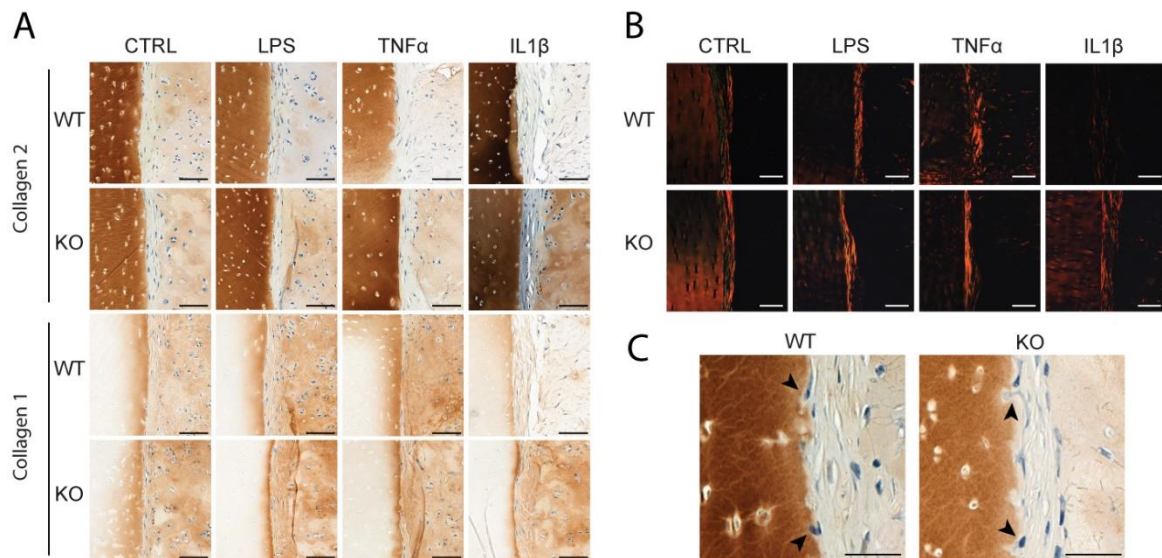

**Figure S3. TAK1-KO cells produce highly aligned collagen 1 fibers at the interface with bovine rings in inflamed conditions and actively migrate into the mature bovine cartilage.** (A) Closeup of the interface between the mature cartilage bovine rings (left) and the neocartilage (right) from WT or KO cells. Scale bar, 100 µm. (B) Polarized light microscopy of the collagen fibers deposited from WT or KO cells at the interface between the bovine rings (left) and the newly formed cartilage (right). Scale bar, 100 µm. (C) High magnification of interface between bovine cartilage (left) and WT or KO cells (right); representative image of control conditions, human cells are indicated with black arrows. Scale bar, 50 µm.

## Supplementary Tables

**Table S1. Sequences of possible analyzed off-targets. Mismatches are marked in bold.**

| Off target |                                   |         |       |            |            |                     |                            |                             |
|------------|-----------------------------------|---------|-------|------------|------------|---------------------|----------------------------|-----------------------------|
| Identifier | gRNA sequence                     | PAM     | Score | Mismatches | Gene       | Locus               | Primer Fw                  | Primer Rv                   |
| TAK1 KO    | AATATTAGGATGGTT<br>CACAC          | GG<br>G | N/A   |            | MAP3<br>K7 | chr6:+90568<br>587  |                            |                             |
| OT 1       | AATAGTA <b>A</b> TATGGTT<br>CACAC | TG<br>G | 23    | 3          |            | chr4:+11545<br>6560 | CAAGGTGACACCAGA<br>GTGGG   | TTGGGGTGCGCATGTA<br>AGTA    |
| OT 2       | CA <b>A</b> ATTAGGATGGT<br>TCACTC | TG<br>G | 24    | 3          |            | chr16:+8495<br>8643 | ACTAGTCTGAGGTCCC<br>CCAC   | GCCAACAGACAACAGT<br>GCAG    |
| OT 3       | AGTATTA <b>A</b> GGAGGT<br>TCACAC | CG<br>G | 24    | 4          |            | chr7:-<br>67608135  | TGAGAGAGATGGGAG<br>CGTGT   | ACACGCAAAGAGTCCCT<br>GAG    |
| OT 4       | AACAT <b>C</b> AGGATGAT<br>TCACAC | CA<br>G | 30    | 3          |            | chr3:-<br>9036920   | GAGGGAAGACCCTGA<br>GACCT   | CAAATGCTTTCCAGTGG<br>CCC    |
| OT 5       | ATTCTTAGGATG-<br>TTCACAC          | AG<br>G | 33    | 3          |            | chr5:-<br>128930785 | ATTAAGGCTGGGCTG<br>CCTAC   | ACCATGCCTAAATAAGG<br>TAGCAC |
| OT 6       | AGTTTTATGATGGTT<br>TACAC          | TG<br>G | 36    | 4          |            | chr13:+7134<br>2904 | TGGACAGGTGCACAT<br>TTTTGTC | TAGAGGATGTCGTTGTC<br>ATGC   |

|      |                          |         |    |   |  |                     |                          |                         |
|------|--------------------------|---------|----|---|--|---------------------|--------------------------|-------------------------|
| OT 7 | AACATTAAGATG-<br>TTCACAC | AA<br>G | 38 | 3 |  | chr4:-<br>31998396  | TCACAATTCAGGGG<br>GCCAA  | ACTAACCATTATTTTGT<br>CA |
| OT 8 | GTTATTAGGAAGTTT<br>CACAC | GA<br>G | 44 | 4 |  | chr15:+6066<br>8518 | AGCGACATAATCAGC<br>CGGAG | GGCATTTCATTGGCTG<br>CGT |

**Table S2. Multiplex inflammatory genes expression in WT and *TAK1*-KO cells, in control or IL-1 $\beta$  treated conditions.**

| Probe Name | WT :<br>CTR<br>L | WT :<br>CTR<br>L | WT :<br>CTR<br>L | WT :<br>IL-<br>1 $\beta$ | WT :<br>IL-<br>1 $\beta$ | WT :<br>IL-<br>1 $\beta$ | KO :<br>CTR<br>L | KO :<br>CTR<br>L | KO :<br>CTR<br>L | KO :<br>IL-<br>1 $\beta$ | KO :<br>IL-<br>1 $\beta$ | KO :<br>IL-<br>1 $\beta$ |
|------------|------------------|------------------|------------------|--------------------------|--------------------------|--------------------------|------------------|------------------|------------------|--------------------------|--------------------------|--------------------------|
| AGER       | 3.16             | 2.75             | 2.64             | 3.47                     | 3.04                     | 2.08                     | 2.95             | 3.16             | 2.87             | 3.73                     | 3.24                     | 2.52                     |
| ALOX12     | 2.03             | 0.43             | 0.47             | 1.88                     | 3.88                     | 2.08                     | 0                | 0                | 0.06             | 0.73                     | 1.51                     | 2.52                     |
| ALOX15     | 0                | 1.43             | 1.47             | 2.3                      | 2.3                      | 1.34                     | 0                | 0.99             | 0.06             | 0                        | 2.24                     | 0.52                     |
| ALOX5      | 0.7              | 1.43             | 0                | 1.3                      | 1.71                     | 1.76                     | 2.28             | 0.99             | 0.06             | 1.32                     | 1.51                     | 0.52                     |
| AREG       | 2.03             | 2.43             | 1.79             | 1.3                      | 4.52                     | 3.22                     | 1.95             | 1.99             | 2.87             | 2.73                     | 2.92                     | 2.52                     |
| ARG1       | 0.7              | 1.43             | 1.06             | 0.3                      | 2.71                     | 2.08                     | 2.54             | 1.99             | 2.38             | 2.32                     | 2.73                     | 0.52                     |
| ATF2       | 9.29             | 9.19             | 8.41             | 8.93                     | 9.32                     | 8.46                     | 9.11             | 9.12             | 9.02             | 9.01                     | 9.04                     | 9.03                     |
| BCL2L1     | 10.4             | 10.4<br>2        | 9.83             | 9.53                     | 10.1<br>8                | 9.13                     | 9.8              | 10.4             | 9.95             | 9.99                     | 9.92                     | 10.6<br>5                |
| BCL6       | 8.85             | 8.93             | 8.34             | 9.37                     | 9.73                     | 8.56                     | 8.7              | 8.7              | 8.78             | 9.1                      | 8.97                     | 9.33                     |
| BIRC2      | 9.53             | 9.37             | 8.79             | 9.18                     | 10.5<br>9                | 9.56                     | 8.79             | 9.52             | 8.83             | 9.49                     | 9.69                     | 9.83                     |
| C1QA       | 0.7              | 0.43             | 1.06             | 3.47                     | 4.62                     | 3.76                     | 0                | 0                | 0.06             | 2.73                     | 1.92                     | 3.32                     |
| C1QB       | 0                | 0.43             | 1.06             | 0.3                      | 0.71                     | 1.34                     | 1.95             | 0                | 0.06             | 1.73                     | 0.92                     | 1.52                     |
| C1R        | 14.2<br>2        | 14.2             | 13.4             | 14.5<br>6                | 14.7<br>6                | 13.7<br>6                | 14.3<br>6        | 13.9<br>9        | 14.2<br>4        | 14.3<br>2                | 14.5<br>1                | 14.3<br>3                |
| C1S        | 12.1<br>4        | 12.1<br>2        | 11.5             | 12.6<br>8                | 13.1<br>9                | 12.0<br>5                | 12.0<br>8        | 12.1<br>7        | 12.1<br>3        | 12.2<br>6                | 12.3<br>4                | 12.5                     |
| C2         | 9.32             | 9.22             | 7.8              | 9.23                     | 9.43                     | 7.9                      | 9.28             | 9.06             | 8.68             | 8.76                     | 9.25                     | 9.3                      |
| C3         | 6.27             | 5.75             | 5.74             | 9.54                     | 10.3<br>8                | 9                        | 4.95             | 5.58             | 5.58             | 7.23                     | 6.86                     | 7.41                     |
| C3AR1      | 0.7              | 3.02             | 3.17             | 5.91                     | 8.49                     | 4.22                     | 1.95             | 3.8              | 3.38             | 2.9                      | 1.92                     | 5.42                     |
| C4A        | 4.29             | 4.75             | 4.28             | 4.3                      | 5.41                     | 4.34                     | 3.86             | 4.45             | 5.55             | 5.94                     | 3.73                     | 5.6                      |

|       |      |      |      |      |      |      |      |      |      |      |      |      |
|-------|------|------|------|------|------|------|------|------|------|------|------|------|
| C5    | 4.87 | 5.24 | 4.96 | 4.1  | 4.52 | 3.76 | 5.24 | 5.69 | 5.45 | 5.62 | 5.09 | 5.8  |
| C6    | 1.29 | 0.43 | 0    | 1.88 | 2.71 | 1.34 | 0    | 0    | 0.06 | 0    | 0    | 1.52 |
| C7    | 0.7  | 0.43 | 0    | 2.3  | 3.71 | 3.56 | 2.28 | 1.58 | 0.06 | 1.73 | 0.92 | 1.52 |
| C8A   | 2.03 | 0.43 | 1.06 | 2.3  | 0.71 | 0    | 2.28 | 0    | 2.06 | 0    | 0.92 | 0.52 |
| C8B   | 1.29 | 1.43 | 1.06 | 1.88 | 2.71 | 0.76 | 2.28 | 0.99 | 1.64 | 0    | 1.92 | 0.52 |
| C9    | 0    | 2.02 | 1.06 | 2.88 | 3.3  | 3.66 | 1.54 | 0    | 0.06 | 0.73 | 2.24 | 2.84 |
| CCL11 | 0    | 0.43 | 0.47 | 4    | 2.71 | 3.22 | 0    | 1.58 | 0.06 | 1.32 | 2.51 | 1.52 |
| CCL13 | 0    | 1.43 | 1.79 | 4    | 1.71 | 4.08 | 0.95 | 1.58 | 1.06 | 2.73 | 1.51 | 2.52 |
| CCL16 | 0.7  | 0.43 | 0    | 2.3  | 4.04 | 2.76 | 1.95 | 0    | 0.06 | 2.06 | 1.51 | 2.1  |
| CCL17 | 2.29 | 0.43 | 1.06 | 4    | 2.71 | 2.76 | 1.95 | 0    | 1.64 | 2.32 | 0.92 | 2.52 |
| CCL19 | 0    | 0.43 | 0.47 | 1.88 | 3.52 | 2.34 | 1.95 | 0    | 0.06 | 0.73 | 0.92 | 0.52 |
| CCL2  | 10.2 | 10.1 | 11.5 | 14.0 | 15.4 | 14.4 | 9.98 | 11.6 | 11.6 | 12.7 | 11.8 | 13.6 |
|       | 7    | 4    | 7    | 8    | 9    | 2    |      | 1    | 6    | 1    | 5    | 2    |
| CCL20 | 0    | 1.43 | 2.06 | 13.5 | 12.3 | 14.0 | 0.95 | 0    | 0.06 | 7.81 | 8.68 | 8.5  |
|       |      |      |      |      | 3    | 8    |      |      |      |      |      |      |
| CCL21 | 2.29 | 2.02 | 0.47 | 2.3  | 1.71 | 2.08 | 1.95 | 1.58 | 0.06 | 2.06 | 0    | 3.1  |
| CCL22 | 0    | 3.02 | 2.06 | 2.88 | 3.52 | 3.22 | 1.95 | 1.99 | 2.06 | 1.32 | 3.09 | 2.1  |
| CCL23 | 0    | 2.43 | 1.79 | 0.3  | 0.71 | 0.76 | 0.95 | 2.58 | 1.06 | 2.32 | 1.51 | 1.52 |
| CCL24 | 1.7  | 2.43 | 2.64 | 2.88 | 3.52 | 2.34 | 2.28 | 2.58 | 1.06 | 2.54 | 2.24 | 2.1  |
| CCL3  | 2.03 | 2.02 | 1.06 | 4.76 | 5.76 | 2.56 | 0    | 1.58 | 2.38 | 2.54 | 1.92 | 3.32 |
| CCL4  | 0.7  | 1.43 | 0.47 | 2.88 | 4.88 | 2.56 | 0    | 0    | 0.06 | 1.32 | 2.24 | 3.32 |
| CCL5  | 1.29 | 0.43 | 1.47 | 9.07 | 8.92 | 5.56 | 0.95 | 0    | 0.06 | 3.82 | 5.38 | 5.98 |
| CCL7  | 6.16 | 5.82 | 7.23 | 11.6 | 12.4 | 9.94 | 5.79 | 6.76 | 7.01 | 8.78 | 7.89 | 10.0 |
|       |      |      |      | 4    | 7    |      |      |      |      |      |      | 9    |
| CCL8  | 4.61 | 4.75 | 5.72 | 13.6 | 14.5 | 10.1 | 3.66 | 4.74 | 6.66 | 9.8  | 9.46 | 11.4 |
|       |      |      |      | 3    | 4    | 6    |      |      |      |      |      | 3    |
| CCR1  | 5.68 | 5.56 | 6    | 6.4  | 8.95 | 5    | 5    | 7.76 | 6.01 | 6.72 | 5.17 | 8.93 |
| CCR2  | 2.29 | 3.43 | 2.28 | 3.76 | 4.04 | 3.66 | 0    | 1.99 | 2.87 | 2.32 | 2.51 | 2.52 |
| CCR3  | 5.4  | 5.75 | 4.72 | 2.88 | 3.04 | 1.76 | 5.28 | 4.45 | 4.97 | 5.64 | 5.31 | 4.6  |
| CCR4  | 0    | 0.43 | 0    | 2.62 | 2.3  | 1.76 | 1.54 | 1.58 | 2.38 | 1.32 | 2.24 | 0.52 |
| CCR7  | 1.7  | 0.43 | 1.06 | 2.88 | 3.52 | 1.34 | 1.54 | 1.99 | 2.06 | 1.73 | 0    | 2.1  |

|        |      |      |      |      |      |      |      |      |      |      |      |      |
|--------|------|------|------|------|------|------|------|------|------|------|------|------|
| CD163  | 1.7  | 1.43 | 0.47 | 1.88 | 3.71 | 3.46 | 1.54 | 0    | 2.06 | 1.73 | 1.92 | 1.52 |
| CD4    | 1.29 | 1.43 | 2.28 | 1.3  | 2.71 | 0.76 | 1.54 | 1.58 | 1.06 | 1.32 | 0    | 2.52 |
| CD40   | 3.61 | 3.89 | 2.28 | 5.72 | 6.92 | 4.28 | 3.41 | 3.69 | 2.64 | 3.43 | 3.38 | 4.32 |
| CD40LG | 1.29 | 0.43 | 1.47 | 3.62 | 4.8  | 3.34 | 1.54 | 0.99 | 2.06 | 2.32 | 0    | 3.32 |
| CD55   | 6.91 | 7.03 | 6.52 | 6.15 | 6.74 | 5.8  | 7.15 | 7.21 | 7.29 | 6.78 | 6.73 | 6.96 |
| CD86   | 2.51 | 2.43 | 1.79 | 2.3  | 3.71 | 3.34 | 2.28 | 1.99 | 1.06 | 1.73 | 3.51 | 3.1  |
| CDC42  | 12.1 | 12.1 | 11.7 | 11.7 | 12.2 | 11.2 | 12.1 | 12.0 | 12.0 | 12.0 | 12.1 | 12.1 |
|        | 6    |      | 3    | 7    | 8    | 3    | 1    | 9    | 2    | 1    | 2    | 4    |
| CEBPB  | 10.4 | 10.4 | 9.99 | 11.9 | 12.8 | 11.8 | 10.0 | 10.5 | 10.2 | 11.3 | 11.1 | 11.5 |
|        | 4    | 7    |      | 6    | 9    | 5    | 3    | 5    | 1    | 9    | 7    | 6    |
| CFB    | 9.4  | 9.45 | 8.88 | 14.1 | 14.4 | 12.9 | 9.38 | 10.1 | 9.74 | 10.8 | 10.8 | 11.8 |
|        |      |      |      | 4    | 6    | 4    |      | 5    |      | 9    | 9    | 1    |
| CFD    | 6.42 | 6.31 | 4.28 | 7.36 | 7.14 | 5.25 | 6.14 | 4.99 | 5.58 | 5.76 | 6.61 | 5.04 |
| CFL1   | 13.1 | 13.1 | 12.6 | 12.9 | 13.2 | 12.2 | 13.0 | 12.9 | 12.9 | 12.8 | 13.0 | 13.0 |
|        | 9    | 9    |      | 8    | 8    | 9    | 8    | 6    | 8    | 9    | 6    | 6    |
| CREB1  | 8.99 | 8.87 | 8.48 | 8.8  | 9.17 | 8.44 | 8.98 | 8.74 | 8.73 | 8.83 | 8.85 | 8.95 |
| CRP    | 0    | 1.43 | 0.47 | 1.3  | 2.3  | 0    | 0.95 | 0    | 1.06 | 0.73 | 0.92 | 2.84 |
| CSF1   | 8.95 | 8.98 | 9.28 | 9.27 | 11.6 | 10.2 | 9.12 | 9.62 | 10.0 | 10.6 | 9.52 | 10.6 |
|        |      |      |      |      | 8    | 2    |      |      | 9    | 2    |      | 1    |
| CSF2   | 1.7  | 2.43 | 0    | 8.4  | 7.22 | 9.74 | 0.95 | 0    | 1.06 | 5.02 | 5.85 | 5.1  |
| CSF3   | 0    | 0.43 | 1.06 | 8.91 | 8.71 | 8.62 | 0    | 0    | 1.06 | 2.06 | 4.01 | 3.32 |
| CXCL1  | 1.7  | 0.43 | 0.47 | 15.3 | 15.5 | 14.9 | 3.54 | 2.58 | 1.06 | 10.4 | 11.3 | 11.5 |
|        |      |      |      | 1    | 9    | 7    |      |      |      | 4    | 3    | 3    |
| CXCL10 | 1.29 | 0.43 | 0.47 | 10.9 | 14.1 | 8.6  | 0    | 1.58 | 1.06 | 6.18 | 5.97 | 9.65 |
|        |      |      |      | 3    |      |      |      |      |      |      |      |      |
| CXCL2  | 3.61 | 2.43 | 2.06 | 12.0 | 12.3 | 12.5 | 3.12 | 3.16 | 3.76 | 7.33 | 8.93 | 8.25 |
|        |      |      |      | 7    | 7    | 2    |      |      |      |      |      |      |
| CXCL3  | 2.51 | 0.43 | 0    | 13.0 | 12.7 | 13.1 | 1.95 | 3.31 | 2.38 | 7.07 | 8.46 | 8.4  |
|        |      |      |      | 8    | 8    | 5    |      |      |      |      |      |      |
| CXCL5  | 0    | 1.43 | 1.06 | 9.38 | 8.8  | 8.29 | 0.95 | 0    | 1.06 | 3.64 | 5.38 | 4.98 |

|             |           |           |           |           |           |           |           |           |           |           |           |           |
|-------------|-----------|-----------|-----------|-----------|-----------|-----------|-----------|-----------|-----------|-----------|-----------|-----------|
| CXCL6       | 1.7       | 1.43      | 0         | 13.8      | 13.7<br>9 | 11.7<br>8 | 2.28      | 2.8       | 3.23      | 8.12      | 10.2<br>7 | 9.62      |
| CXCL9       | 1.7       | 2.75      | 0.47      | 4.69      | 4.62      | 3.22      | 2.54      | 1.58      | 1.64      | 3.19      | 1.92      | 2.1       |
| CXCR1       | 0         | 1.43      | 1.47      | 2.3       | 2.3       | 2.08      | 0.95      | 0         | 0.06      | 0.73      | 0         | 1.52      |
| CXCR2       | 1.7       | 0.43      | 0.47      | 1.3       | 0.71      | 0.76      | 0         | 0         | 0.06      | 0         | 2.24      | 0.52      |
| CXCR4       | 0.7       | 2.02      | 1.79      | 3.1       | 3.52      | 3.84      | 2.28      | 1.99      | 0.06      | 2.32      | 0         | 2.84      |
| CYSLTR<br>1 | 0.7       | 2.02      | 1.47      | 2.3       | 4.62      | 3.93      | 2.28      | 1.99      | 3.38      | 3.32      | 1.92      | 3.84      |
| CYSLTR<br>2 | 2.03      | 0.43      | 0         | 2.3       | 2.71      | 0.76      | 0         | 1.58      | 2.06      | 0.73      | 0         | 0.52      |
| DAXX        | 9.74      | 9.67      | 9.13      | 10.2<br>5 | 10.6<br>1 | 9.57      | 9.41      | 9.57      | 9.36      | 9.5       | 9.59      | 9.85      |
| DDIT3       | 9.37      | 9.39      | 8.74      | 10.3<br>5 | 11.3<br>1 | 10.2<br>8 | 9.02      | 9.02      | 9.04      | 9.57      | 9.54      | 9.73      |
| DEFA1       | 0         | 0.43      | 0         | 3.62      | 1.71      | 2.08      | 0         | 0.99      | 1.06      | 2.32      | 0.92      | 2.52      |
| ELK1        | 7.58      | 7.58      | 7.08      | 8.13      | 8.17      | 7.29      | 7.42      | 7.52      | 7.57      | 7.47      | 7.36      | 7.53      |
| FASLG       | 0.7       | 1.43      | 0         | 1.3       | 0.71      | 0.76      | 1.95      | 2.31      | 0.06      | 1.73      | 1.92      | 0.52      |
| FLT1        | 1.29      | 2.43      | 0.47      | 3.76      | 3.3       | 3.08      | 0         | 1.99      | 0.06      | 1.32      | 2.24      | 1.52      |
| FOS         | 6.24      | 5.89      | 5.86      | 6.71      | 7.36      | 5.95      | 6.29      | 5.42      | 6.04      | 6.45      | 6.59      | 6.07      |
| FXD2        | 5.06      | 4.95      | 5.49      | 5.1       | 7.12      | 5         | 5.41      | 6.37      | 6.34      | 6.36      | 5.7       | 7.52      |
| GNAQ        | 9.01      | 8.88      | 8.17      | 8.07      | 8.6       | 7.87      | 9.11      | 8.92      | 8.65      | 8.61      | 8.98      | 8.92      |
| GNAS        | 11.8<br>5 | 11.7<br>3 | 11.1      | 11.0<br>2 | 11.7<br>7 | 10.9<br>3 | 11.2<br>5 | 11.5<br>2 | 11.2      | 11.5<br>1 | 11.5<br>4 | 11.5<br>7 |
| GNB1        | 11.9      | 11.8<br>5 | 11.4<br>3 | 11.5<br>2 | 12.1<br>3 | 11.3<br>8 | 11.6<br>6 | 11.8<br>4 | 11.5<br>8 | 11.7<br>3 | 11.8<br>4 | 11.9<br>8 |
| GNGT1       | 0.7       | 2.02      | 1.47      | 3.3       | 3.52      | 3.56      | 0         | 0         | 1.64      | 0.73      | 2.92      | 2.52      |
| GRB2        | 3.87      | 3.75      | 3.56      | 4.1       | 4.3       | 4.22      | 3.66      | 4.08      | 4.15      | 3.82      | 3.83      | 4.52      |
| HDAC4       | 7.75      | 7.55      | 6.81      | 7.06      | 7.11      | 6.8       | 7.71      | 7.35      | 7.59      | 7.7       | 7.67      | 7.46      |
| HIF1A       | 13.7<br>8 | 13.7      | 13.5<br>9 | 14.4<br>5 | 15.3<br>8 | 13.4<br>6 | 13.6<br>8 | 13.8<br>9 | 14.2      | 14.4<br>4 | 14.0<br>4 | 14.6<br>3 |



|          |       |       |      |       |       |       |       |       |       |       |       |       |
|----------|-------|-------|------|-------|-------|-------|-------|-------|-------|-------|-------|-------|
| HLA-DRA  | 5.03  | 4.82  | 3.79 | 4.54  | 6.11  | 3.66  | 4.76  | 4.63  | 4.15  | 4.94  | 4.88  | 5.1   |
| HLA-DRB1 | 3.79  | 3.6   | 0    | 3.62  | 7.56  | 2.08  | 3.28  | 6.42  | 2.06  | 3.06  | 3.24  | 6.04  |
| HMGB1    | 9.88  | 9.96  | 9.44 | 9.48  | 9.89  | 9.2   | 9.93  | 9.91  | 9.72  | 9.89  | 9.94  | 9.82  |
| HMGB2    | 8.06  | 7.89  | 7.92 | 7.19  | 6.74  | 6.74  | 8.14  | 7.55  | 8.07  | 7.94  | 7.71  | 7.16  |
| HMGNI    | 10.58 | 10.51 | 9.93 | 9.94  | 9.97  | 9.46  | 10.55 | 10.47 | 10.55 | 10.48 | 10.43 | 10.42 |
| HRAS     | 7.02  | 6.77  | 6.58 | 6.51  | 6.57  | 6.02  | 6.81  | 7.01  | 6.83  | 6.83  | 6.84  | 7.01  |
| HSH2D    | 0     | 0.43  | 1.47 | 1.88  | 4.3   | 0     | 0     | 0.99  | 1.06  | 1.32  | 0     | 2.1   |
| HSPB1    | 8.92  | 8.8   | 8.54 | 7.67  | 8.09  | 7.08  | 9.05  | 8.68  | 8.78  | 8.72  | 8.74  | 8.66  |
| HSPB2    | 7.55  | 7.76  | 6.55 | 6.53  | 7.4   | 5.86  | 7.55  | 7.62  | 7.05  | 6.84  | 7.28  | 7.23  |
| IFI44    | 6.35  | 6.08  | 5.58 | 10.29 | 10.86 | 9.5   | 6.54  | 6.4   | 6.81  | 9.86  | 9.66  | 10.63 |
| IFIT1    | 7.85  | 7.75  | 6.85 | 14.04 | 15.13 | 12.88 | 7.19  | 7.19  | 7.53  | 12.36 | 11.77 | 13.59 |
| IFIT2    | 7.05  | 6.92  | 4.28 | 12.67 | 15.01 | 9.5   | 6.54  | 7.29  | 5.15  | 8.97  | 10.45 | 12.78 |
| IFIT3    | 6.81  | 6.66  | 5.68 | 11.57 | 12.89 | 10.18 | 6.71  | 6.26  | 6.45  | 9.88  | 9.82  | 11.29 |
| IFNA1    | 2.29  | 2.43  | 1.79 | 0.3   | 1.71  | 2.34  | 2.54  | 2.8   | 0.06  | 2.06  | 0.92  | 1.52  |
| IFNB1    | 0     | 2.02  | 1.06 | 3.88  | 5.3   | 3.76  | 0     | 1.58  | 1.06  | 1.32  | 2.24  | 0.52  |
| IFNG     | 0.7   | 1.43  | 0.47 | 1.3   | 1.71  | 2.56  | 0     | 1.99  | 0.06  | 2.06  | 1.51  | 2.84  |
| IL10     | 4.79  | 4.95  | 2.06 | 3.76  | 3.04  | 2.08  | 4.66  | 4.16  | 5.45  | 5.54  | 4.92  | 4.98  |
| IL10RB   | 9.24  | 9.29  | 9.06 | 8.97  | 9.75  | 8.7   | 9.27  | 9.52  | 9.49  | 9.42  | 9.37  | 9.42  |
| IL11     | 2.7   | 3.6   | 3.72 | 11.71 | 10.7  | 13.12 | 3.12  | 0     | 2.87  | 4.86  | 4.73  | 4.32  |
| IL12A    | 4.79  | 3.89  | 4.83 | 5.51  | 6.55  | 6.02  | 4.6   | 4.08  | 3.97  | 5.49  | 4.78  | 4.76  |
| IL12B    | 1.7   | 2.75  | 0.47 | 1.3   | 3.71  | 0.76  | 1.54  | 2.58  | 1.06  | 0     | 2.24  | 3.32  |
| IL13     | 0     | 0.43  | 0    | 1.88  | 3.04  | 3.22  | 0     | 2.31  | 0.06  | 2.32  | 1.51  | 2.84  |
| IL15     | 2.03  | 1.43  | 1.47 | 3.76  | 5.57  | 3.08  | 3.28  | 0.99  | 2.06  | 2.9   | 3.92  | 4.1   |

|         |      |      |      |           |           |           |      |      |      |           |           |           |
|---------|------|------|------|-----------|-----------|-----------|------|------|------|-----------|-----------|-----------|
| IL17A   | 2.03 | 2.43 | 1.79 | 2.62      | 3.52      | 1.34      | 2.54 | 2.8  | 1.64 | 1.73      | 2.92      | 2.1       |
| IL18    | 3.29 | 3.6  | 1.79 | 3.62      | 2.71      | 3.34      | 1.54 | 1.58 | 2.64 | 0         | 2.73      | 3.1       |
| IL18RAP | 1.29 | 1.43 | 0    | 1.3       | 3.04      | 1.76      | 1.54 | 2.58 | 1.64 | 2.32      | 0.92      | 1.52      |
| IL1A    | 2.29 | 2.02 | 0    | 7.53      | 7.31      | 5.82      | 2.54 | 0.99 | 1.64 | 2.32      | 4.68      | 3.98      |
| IL1B    | 0.7  | 0.43 | 1.47 | 9.04      | 8.38      | 7.73      | 2.28 | 2.8  | 1.64 | 4.06      | 6.13      | 4.84      |
| IL1R1   | 8.3  | 8.34 | 7.02 | 8.25      | 9.11      | 6.77      | 8.65 | 8.52 | 8.34 | 8.33      | 8.61      | 8.46      |
| IL1RAP  | 5.7  | 5.79 | 5.56 | 6.49      | 6.88      | 6.28      | 6.38 | 5.82 | 6.12 | 6.35      | 6.55      | 6.32      |
| IL1RN   | 5.23 | 5.13 | 3.72 | 12.7<br>6 | 12.9<br>5 | 10.7<br>2 | 4.35 | 5.31 | 3.97 | 6.72      | 8.42      | 9.13      |
| IL2     | 2.03 | 1.43 | 1.79 | 0.3       | 2.3       | 2.08      | 2.95 | 1.58 | 1.64 | 2.06      | 0         | 0.52      |
| IL21    | 1.7  | 0.43 | 1.06 | 2.88      | 3.04      | 2.76      | 0    | 1.58 | 0.06 | 0.73      | 0.92      | 0.52      |
| IL22    | 0.7  | 0.43 | 1.06 | 0.3       | 0.71      | 0.76      | 1.54 | 1.58 | 0.06 | 1.32      | 0         | 2.1       |
| IL22RA2 | 1.29 | 1.43 | 1.06 | 1.3       | 1.71      | 0.76      | 0    | 0    | 0.06 | 0.73      | 0         | 2.52      |
| IL23A   | 1.7  | 2.02 | 0    | 7.58      | 7.77      | 9.27      | 1.54 | 0.99 | 1.06 | 2.54      | 3.09      | 2.84      |
| IL23R   | 0.7  | 0.43 | 0    | 1.88      | 0.71      | 1.76      | 0    | 0.99 | 0.06 | 1.32      | 1.92      | 2.84      |
| IL3     | 0.7  | 0.43 | 0.47 | 1.88      | 2.3       | 1.34      | 0    | 0.99 | 1.06 | 0.73      | 0.92      | 2.1       |
| IL4     | 2.29 | 2.43 | 2.28 | 1.3       | 3.71      | 2.34      | 1.54 | 2.58 | 1.06 | 2.06      | 2.51      | 2.84      |
| IL5     | 2.29 | 0.43 | 1.47 | 1.3       | 1.71      | 1.34      | 1.54 | 1.58 | 2.06 | 1.73      | 0         | 2.52      |
| IL6     | 4.7  | 4.24 | 5.86 | 14.2<br>3 | 14.4<br>6 | 14.4<br>1 | 4.28 | 3.45 | 3.64 | 8.77      | 9.62      | 9.69      |
| IL6R    | 6.38 | 6.08 | 5.2  | 6.54      | 6.44      | 5.71      | 6    | 6.65 | 6.21 | 5.8       | 6.07      | 5.87      |
| IL7     | 1.7  | 3.24 | 1.06 | 3.88      | 5.04      | 4.08      | 2.54 | 2.58 | 2.87 | 3.64      | 2.92      | 3.32      |
| IL8     | 0.7  | 1.43 | 1.47 | 16.4      | 16.3<br>4 | 17.0<br>2 | 0.95 | 1.58 | 1.64 | 11.6<br>2 | 12.6<br>1 | 12.3<br>9 |
| IL9     | 1.29 | 0.43 | 0    | 1.88      | 3.04      | 1.76      | 0    | 0    | 1.64 | 2.32      | 2.51      | 0.52      |
| IRF1    | 6.21 | 6.19 | 6.03 | 7.76      | 9.51      | 6.77      | 6.35 | 6.43 | 6.45 | 6.57      | 6.73      | 7.64      |
| IRF3    | 5.59 | 6.05 | 5    | 5.76      | 6.64      | 5.54      | 5.71 | 5.97 | 6.31 | 6.14      | 5.97      | 6.32      |
| IRF5    | 2.03 | 1.43 | 2.06 | 1.88      | 2.71      | 2.93      | 2.54 | 2.58 | 2.87 | 2.06      | 2.92      | 1.52      |
| IRF7    | 5.38 | 5.43 | 4.38 | 9.21      | 10.2<br>6 | 8.79      | 5.51 | 5.31 | 4.87 | 8.43      | 8.17      | 9.41      |
| ITGB2   | 6.5  | 6.31 | 7.23 | 6.47      | 7.12      | 6.99      | 5.86 | 6.63 | 7.3  | 7.08      | 5.92      | 6.56      |



|                       |      |      |      |           |           |           |           |           |           |           |           |           |
|-----------------------|------|------|------|-----------|-----------|-----------|-----------|-----------|-----------|-----------|-----------|-----------|
| MAPK3                 | 10.4 | 10.4 | 9.68 | 9.58      | 10.4<br>2 | 8.9       | 10.4<br>3 | 10.7<br>3 | 10.4<br>9 | 10.3      | 10.3<br>4 | 10.8<br>6 |
| MAPK8                 | 8.05 | 7.95 | 7.54 | 8.15      | 8.32      | 7.95      | 7.68      | 7.81      | 7.81      | 7.95      | 8.11      | 7.64      |
| MAPKA<br>PK2          | 8.83 | 8.83 | 8.35 | 9.55      | 9.84      | 8.41      | 8.91      | 8.85      | 8.83      | 8.92      | 8.95      | 9.3       |
| MAPKA<br>PK5          | 8.17 | 8.19 | 7.7  | 8.33      | 8.66      | 7.6       | 8.08      | 8.28      | 8.26      | 8.16      | 8.33      | 8.46      |
| MASP1                 | 4.91 | 5.48 | 4.23 | 4.54      | 4.71      | 3.93      | 5.71      | 3.8       | 4.52      | 4.32      | 5.9       | 3.84      |
| MASP2                 | 2.03 | 1.43 | 1.06 | 1.88      | 2.71      | 0.76      | 1.54      | 0.99      | 2.06      | 0.73      | 0         | 1.52      |
| MAX<br>3              | 10.0 | 9.98 | 9.48 | 10.1<br>7 | 11.2      | 9.82      | 9.93      | 9.91      | 9.93      | 10.1      | 10.1<br>1 | 10.3<br>5 |
| MBL2                  | 1.29 | 0.43 | 0    | 1.88      | 2.71      | 2.56      | 1.54      | 0         | 0.06      | 1.32      | 0         | 0.52      |
| MEF2A                 | 9.17 | 9.22 | 8.79 | 8.59      | 9.39      | 9         | 9.14      | 9.38      | 9.05      | 9.11      | 9.21      | 9.58      |
| MEF2B<br>NB-<br>MEF2B | 2.7  | 3.02 | 2.64 | 0.3       | 3.3       | 3.34      | 3.12      | 3.16      | 3.06      | 3.43      | 2.24      | 3.98      |
| MEF2C                 | 7.63 | 7.51 | 6.28 | 6.85      | 7.51      | 5.82      | 7.58      | 7.1       | 7.43      | 7.35      | 7.55      | 7.52      |
| MEF2D                 | 8.09 | 8.03 | 7.23 | 7.55      | 7.3       | 7.47      | 7.73      | 7.74      | 7.57      | 7.55      | 7.9       | 7.55      |
| MKNK1                 | 7.84 | 7.68 | 7.34 | 7.73      | 8.07      | 7.25      | 7.78      | 7.73      | 7.79      | 7.71      | 7.87      | 7.67      |
| MMP3                  | 2.87 | 2.43 | 7.14 | 15.2<br>1 | 15.0<br>5 | 15.5<br>5 | 1.54      | 2.58      | 3.97      | 10.2<br>6 | 10.3<br>7 | 10.5<br>9 |
| MMP9                  | 2.51 | 3.02 | 1.79 | 3.47      | 3.52      | 0.76      | 0         | 2.31      | 0.06      | 1.32      | 2.24      | 1.52      |
| MRC1                  | 0    | 2.02 | 1.47 | 1.3       | 3.52      | 1.34      | 2.54      | 1.58      | 1.64      | 1.73      | 2.51      | 1.52      |
| MX1                   | 7.83 | 8.03 | 6.97 | 14.9      | 16.0<br>9 | 14.0<br>3 | 7         | 8.89      | 8.04      | 13.9<br>3 | 13.3<br>8 | 15.1<br>7 |
| MX2                   | 1.29 | 2.75 | 1.79 | 10.2<br>6 | 10.7<br>7 | 8.13      | 1.95      | 0.99      | 2.87      | 6.99      | 7.36      | 8.64      |
| MYC                   | 8.22 | 8.03 | 7.76 | 8.12      | 8.11      | 7.72      | 8.33      | 8.13      | 7.89      | 8.23      | 8.57      | 8.56      |
| MYD88                 | 9.04 | 8.82 | 7.89 | 10.1<br>6 | 11.3<br>7 | 9.34      | 8.96      | 8.88      | 8.85      | 9.77      | 9.67      | 10.6      |
| MYL2                  | 2.29 | 2.02 | 1.06 | 0.3       | 2.71      | 0.76      | 2.28      | 1.99      | 0.06      | 0         | 1.51      | 0.52      |

|        |      |      |      |      |      |      |      |      |      |      |      |      |
|--------|------|------|------|------|------|------|------|------|------|------|------|------|
| NFATC3 | 7.62 | 7.6  | 7.09 | 7.68 | 8.1  | 7.13 | 7.76 | 7.77 | 7.77 | 7.69 | 7.75 | 7.86 |
| NFE2L2 | 10.7 | 10.6 | 10.2 | 10.3 | 11.4 | 10.1 | 10.6 | 10.7 | 10.9 | 11.0 | 10.8 | 11   |
|        | 7    | 7    | 2    | 7    |      | 6    | 8    | 7    | 1    | 1    | 7    |      |
| NFKB1  | 7    | 6.89 | 6.56 | 8.8  | 9.7  | 8.1  | 6.78 | 6.68 | 6.74 | 6.84 | 7.19 | 7.37 |
| NLRP3  | 1.7  | 1.43 | 1.79 | 3.1  | 3.04 | 0.76 | 2.28 | 0    | 2.64 | 2.06 | 0    | 2.1  |
| NOD1   | 5.29 | 5.34 | 4.12 | 5.91 | 6.69 | 4.8  | 5.35 | 5.38 | 5.73 | 5.66 | 5.68 | 6.04 |
| NOD2   | 1.29 | 1.43 | 0.47 | 7.09 | 7.68 | 6.72 | 0    | 0.99 | 1.06 | 3.06 | 3.83 | 3.98 |
| NOS2   | 2.29 | 1.43 | 2.93 | 2.3  | 4.17 | 4.4  | 2.28 | 2.58 | 1.64 | 3.32 | 2.51 | 2.52 |
| NOX1   | 3.61 | 1.43 | 0.47 | 3.1  | 4.04 | 3.08 | 1.95 | 1.99 | 1.64 | 2.9  | 3.24 | 2.1  |
| NR3C1  | 9.82 | 9.8  | 9.41 | 10.5 | 11.0 | 10.2 | 10.0 | 10.0 | 9.93 | 9.86 | 10.1 | 10.1 |
|        |      |      |      | 2    | 6    | 6    | 4    | 3    |      |      | 2    | 7    |
| OAS2   | 6.39 | 6.16 | 5.28 | 12.5 | 13.3 | 11.6 | 6.22 | 5.63 | 6.36 | 11.3 | 11.0 | 12.2 |
|        |      |      |      | 3    | 8    | 9    |      |      |      | 6    | 5    | 3    |
| OASL   | 3.51 | 4.43 | 2.47 | 11.3 | 12.9 | 10.3 | 1.54 | 4.16 | 2.64 | 8.73 | 8.22 | 10.9 |
|        |      |      |      | 1    | 2    | 4    |      |      |      |      |      | 4    |
| OXER1  | 2.29 | 3.24 | 1.79 | 3.62 | 3.88 | 2.93 | 3.28 | 3.31 | 3.38 | 3.19 | 2.92 | 2.84 |
| PDGFA  | 3.79 | 3.43 | 4.23 | 3.62 | 4.41 | 4.71 | 4.12 | 2.99 | 5.1  | 5.19 | 4.44 | 2.84 |
| PIK3C2 | 0    | 1.43 | 1.47 | 2.3  | 2.71 | 2.08 | 0.95 | 0    | 1.06 | 2.32 | 0.92 | 0.52 |
| G      |      |      |      |      |      |      |      |      |      |      |      |      |
| PLA2G4 | 8.24 | 8.49 | 8.05 | 11.6 | 11.9 | 11.2 | 8.4  | 8.04 | 8.39 | 8.93 | 9.11 | 9.24 |
| A      |      |      |      | 6    | 3    | 9    |      |      |      |      |      |      |
| PLCB1  | 6.11 | 5.48 | 6.52 | 4.38 | 6.11 | 5.22 | 6.14 | 6.42 | 6.73 | 6.63 | 5.99 | 6.8  |
| PPP1R1 | 6.03 | 6.19 | 5.78 | 4.62 | 5.88 | 4.71 | 5.98 | 6.43 | 5.67 | 6.02 | 6.01 | 5.56 |
| 2B     |      |      |      |      |      |      |      |      |      |      |      |      |
| PRKCA  | 7.48 | 7.58 | 7.33 | 4.88 | 5.84 | 6.08 | 7.49 | 7.45 | 7.63 | 7.38 | 7.11 | 7.26 |
| PRKCB  | 0.7  | 0.43 | 0    | 2.62 | 2.3  | 2.34 | 1.95 | 0.99 | 1.06 | 0.73 | 0.92 | 0.52 |
| PTGDR2 | 2.29 | 2.02 | 1.47 | 3.1  | 2.3  | 2.93 | 0.95 | 1.58 | 1.64 | 1.73 | 2.51 | 3.1  |
| PTGER1 | 1.29 | 0.43 | 0.47 | 0.3  | 2.71 | 1.34 | 0    | 0    | 1.06 | 0.73 | 0    | 0.52 |
| PTGER2 | 8.06 | 7.95 | 5.85 | 8.26 | 8.53 | 7.6  | 8.61 | 8.73 | 8.35 | 8.1  | 8.75 | 8.72 |
| PTGER3 | 1.29 | 2.75 | 0    | 2.88 | 4.17 | 2.76 | 1.54 | 2.58 | 1.06 | 0.73 | 0    | 2.84 |
| PTGER4 | 5.97 | 5.64 | 5.62 | 5.79 | 5.88 | 6.34 | 5.28 | 7.01 | 6.76 | 6.3  | 4.44 | 5.84 |

|             |           |           |           |           |           |           |           |           |           |           |           |           |
|-------------|-----------|-----------|-----------|-----------|-----------|-----------|-----------|-----------|-----------|-----------|-----------|-----------|
| PTGFR       | 11.1<br>2 | 11.0<br>9 | 10.4<br>3 | 11.4<br>9 | 11.1<br>7 | 10.5<br>6 | 11.2<br>2 | 10.0<br>2 | 11.0<br>8 | 11.3<br>1 | 11.6<br>2 | 10.6<br>9 |
| PTGIR       | 3.51      | 3.24      | 3.28      | 3.3       | 4.8       | 3.93      | 3.12      | 3.58      | 3.52      | 4.26      | 3.24      | 4.1       |
| PTGS1       | 2.51      | 3.43      | 2.06      | 1.88      | 2.3       | 4.08      | 3.41      | 2.58      | 3.23      | 3.19      | 1.92      | 2.1       |
| PTGS2       | 6.15      | 6.24      | 7.71      | 12.7<br>4 | 12.8<br>7 | 13.2      | 6.46      | 5.12      | 6.15      | 7.86      | 8.44      | 8.39      |
| PTK2        | 10.1<br>9 | 10.1<br>6 | 9.58      | 9.82      | 10.4<br>2 | 9.67      | 10.2<br>3 | 10.5<br>3 | 10.1<br>8 | 10.1<br>6 | 10.3<br>3 | 10.6<br>7 |
| RAC1        | 11.4<br>9 | 11.4<br>3 | 10.9<br>6 | 10.9<br>1 | 11.6<br>1 | 10.6<br>8 | 11.1<br>4 | 11.3<br>5 | 11.0<br>4 | 11.2<br>7 | 11.4<br>2 | 11.3<br>5 |
| RAF1        | 9.57      | 9.52      | 9.15      | 9.83      | 10.1<br>9 | 9.5       | 9.4       | 9.51      | 9.5       | 9.55      | 9.5       | 9.61      |
| RAPGEF<br>2 | 7.63      | 7.37      | 7.19      | 7.87      | 8.03      | 7.46      | 7.45      | 7.55      | 7.43      | 7.55      | 7.72      | 7.76      |
| RELA        | 8.27      | 8.28      | 7.91      | 9.27      | 10.1<br>6 | 8.59      | 8.24      | 8.23      | 8.19      | 8.27      | 8.5       | 8.58      |
| RELB        | 6.9       | 6.74      | 6.75      | 9.2       | 9.64      | 8.53      | 5.98      | 6.14      | 6.23      | 6.72      | 6.83      | 7.12      |
| RHOA        | 10.4<br>6 | 10.3<br>6 | 10.2      | 10.2<br>4 | 10.5<br>4 | 10.1      | 10.4<br>2 | 10.2<br>3 | 10.4<br>4 | 10.3<br>6 | 10.2<br>8 | 10.3<br>1 |
| RIPK1       | 8.62      | 8.47      | 8         | 9.27      | 10.2      | 8.78      | 8.64      | 8.75      | 8.61      | 8.99      | 9.02      | 9.41      |
| RIPK2       | 7.68      | 7.83      | 7.31      | 9.99      | 11.0<br>1 | 9.63      | 7.57      | 7.49      | 7.4       | 7.98      | 8.14      | 8.5       |
| ROCK2       | 10.3      | 10.3<br>3 | 9.9       | 9.73      | 10.2      | 9.21      | 10.3<br>4 | 10.3<br>7 | 10.3<br>6 | 10.3<br>6 | 10.4<br>1 | 10.3<br>8 |
| RPS6KA<br>5 | 6.06      | 6.56      | 4.72      | 5.76      | 6.94      | 4.56      | 6.63      | 6.5       | 5.76      | 5.69      | 6.65      | 6.32      |
| SHC1        | 11.1<br>9 | 11.1<br>7 | 10.4<br>1 | 11.1<br>7 | 11.5<br>6 | 10.3<br>8 | 11.1      | 11.2<br>4 | 11.1<br>7 | 11.1<br>6 | 11.1<br>4 | 11.3<br>9 |
| SMAD7       | 8.01      | 8.08      | 7.72      | 8.83      | 9.74      | 8.71      | 8.27      | 8.09      | 8.26      | 8.12      | 8.36      | 8.48      |
| STAT1       | 10.7<br>5 | 10.7<br>4 | 10.6<br>7 | 13.4<br>7 | 14.4<br>3 | 13.0<br>1 | 10.6<br>9 | 10.7<br>6 | 10.9<br>1 | 12.8<br>2 | 12.5<br>3 | 13.4<br>7 |

|             |           |           |           |           |           |           |           |           |           |           |           |           |
|-------------|-----------|-----------|-----------|-----------|-----------|-----------|-----------|-----------|-----------|-----------|-----------|-----------|
| STAT2       | 11.5<br>5 | 11.5<br>4 | 10.4<br>9 | 12.5<br>4 | 13.5<br>1 | 12.0<br>3 | 11.3<br>2 | 11.3<br>1 | 11.3<br>7 | 12.3      | 12.2<br>8 | 12.6<br>2 |
| STAT3       | 10.9<br>7 | 10.9<br>8 | 10.5<br>1 | 10.9<br>1 | 11.5<br>9 | 9.77      | 11.0<br>1 | 10.9<br>7 | 11.2<br>7 | 11.3<br>7 | 11.1<br>7 | 11.3<br>5 |
| TBXA2R      | 1.7       | 2.75      | 1.79      | 3.3       | 2.71      | 2.34      | 2.76      | 3.45      | 2.38      | 2.32      | 1.51      | 3.84      |
| TCF4        | 9.68      | 9.6       | 9.41      | 9.53      | 10.5<br>2 | 9.05      | 9.32      | 9.26      | 9.99      | 10.0<br>4 | 9.54      | 9.75      |
| TGFB1       | 10.1<br>2 | 9.92      | 9.07      | 9.68      | 10.3<br>1 | 8.85      | 9.93      | 9.97      | 9.89      | 9.87      | 9.91      | 10.2<br>7 |
| TGFB2       | 8.62      | 8.41      | 8.51      | 7.49      | 7.41      | 6.97      | 7.89      | 7.94      | 8.51      | 8.48      | 8.25      | 7.52      |
| TGFB3       | 8.13      | 8.15      | 6.01      | 6.49      | 6.71      | 5.48      | 8.17      | 7.65      | 7.34      | 7.33      | 8.17      | 7.28      |
| TGFBR1      | 8.42      | 8.34      | 7.71      | 7.7       | 7.43      | 7.86      | 8.28      | 7.86      | 7.78      | 7.88      | 8.45      | 7.59      |
| TLR1        | 5.85      | 5.56      | 5.54      | 6.34      | 5.3       | 5.43      | 5.31      | 4.69      | 5.81      | 6         | 5.9       | 4.91      |
| TLR2        | 5.66      | 6.05      | 5.35      | 9.99      | 9.95      | 9.69      | 5.57      | 4.58      | 6.27      | 7.22      | 6.7       | 7.12      |
| TLR3        | 7.08      | 7.19      | 7.03      | 9.29      | 11.0<br>1 | 8.99      | 7.45      | 7.64      | 7.65      | 8.93      | 8.5       | 9.75      |
| TLR4        | 4.99      | 4.34      | 4.96      | 3.1       | 4.62      | 4.51      | 4.2       | 4.74      | 5.55      | 5.29      | 4.31      | 5.16      |
| TLR5        | 3.7       | 3.89      | 4         | 3.3       | 3.71      | 2.56      | 3.28      | 4.24      | 4.45      | 4.64      | 3.73      | 4.42      |
| TLR6        | 4.16      | 4.89      | 4.47      | 3.88      | 4.3       | 3.56      | 4.66      | 5.45      | 5.19      | 4.86      | 3.24      | 5.22      |
| TLR7        | 1.29      | 0.43      | 2.64      | 3.3       | 4.41      | 1.76      | 0.95      | 1.99      | 2.06      | 2.73      | 2.24      | 1.52      |
| TLR8        | 1.29      | 0.43      | 1.47      | 3.1       | 3.3       | 2.76      | 2.28      | 1.99      | 2.87      | 1.73      | 2.73      | 1.52      |
| TLR9        | 2.51      | 1.43      | 0.47      | 3.3       | 2.71      | 2.08      | 1.95      | 1.58      | 1.06      | 2.06      | 2.24      | 2.1       |
| TNF         | 1.29      | 0.43      | 1.06      | 2.62      | 3.52      | 1.34      | 0         | 0         | 1.06      | 0.73      | 1.51      | 2.52      |
| TNFAIP<br>3 | 6.77      | 7.02      | 7.58      | 11.8<br>3 | 12.1<br>6 | 11.3<br>6 | 6.43      | 7.17      | 6.8       | 7.76      | 8.22      | 8.58      |
| TNFSF1<br>4 | 0.7       | 1.43      | 1.06      | 2.62      | 3.04      | 2.76      | 1.95      | 0         | 2.38      | 1.32      | 0         | 2.52      |
| TOLLIP      | 9.18      | 9.19      | 8.75      | 8.75      | 9.21      | 8.15      | 9.12      | 9.25      | 9.29      | 9.32      | 9.18      | 9.46      |
| TRADD       | 5.35      | 4.75      | 4.56      | 6.38      | 7.31      | 5.82      | 6.06      | 5.94      | 5.27      | 5.76      | 5.28      | 6.16      |
| TRAF2       | 6.29      | 6.34      | 5.86      | 7.1       | 7.99      | 6.66      | 6.54      | 6.6       | 6.45      | 6.59      | 6.51      | 6.87      |
| TREM2       | 0         | 0.43      | 0.47      | 2.3       | 3.88      | 3.56      | 1.54      | 1.58      | 0.06      | 2.06      | 0.92      | 2.1       |

|        |      |      |      |      |      |      |      |      |      |      |      |      |
|--------|------|------|------|------|------|------|------|------|------|------|------|------|
| TSLP   | 6.47 | 6.36 | 6.38 | 9.04 | 8.84 | 8.26 | 5.81 | 7.38 | 6.1  | 6.8  | 7.45 | 8.33 |
| TWIST2 | 8.1  | 8.1  | 7.07 | 9.07 | 8.66 | 7.51 | 8.21 | 8.13 | 7.92 | 8.47 | 8.66 | 8.59 |
| TYROBP | 0.7  | 0.43 | 1.79 | 1.3  | 0.71 | 0.76 | 1.54 | 0.99 | 2.38 | 2.06 | 1.51 | 0.52 |
| CLTC   | 11.0 | 11.0 | 10.7 | 10.6 | 10.8 | 10.3 | 11.0 | 11.3 | 11.1 | 11.0 | 11.0 | 11.2 |
|        | 8    | 1    | 1    | 1    | 8    | 3    | 2    | 2    | 9    | 5    | 3    | 2    |
| GAPDH  | 14.8 | 14.7 | 14.9 | 14.6 | 14.5 | 15.1 | 14.5 | 14.6 | 14.5 | 14.6 | 14.5 | 14.7 |
|        |      | 4    | 2    | 4    | 9    |      |      | 4    | 5    | 3    | 1    | 3    |
| GUSB   | 7.86 | 8.02 | 6.99 | 7.55 | 7.78 | 6.79 | 7.82 | 7.6  | 7.4  | 7.69 | 7.97 | 7.56 |
| HPRT1  | 8.58 | 8.64 | 8.77 | 8.35 | 8.23 | 8.37 | 8.78 | 8.55 | 8.71 | 8.67 | 8.73 | 8.52 |
| PGK1   | 11.9 | 11.8 | 12.7 | 12.6 | 12.1 | 13.4 | 11.8 | 11.9 | 12.2 | 12.1 | 11.8 | 12.0 |
|        | 1    | 5    | 3    | 1    | 9    | 3    | 1    | 1    | 1    | 6    | 1    | 1    |
| TUBB   | 12.6 | 12.5 | 12.7 | 13.0 | 13.1 | 12.7 | 12.9 | 12.8 | 12.7 | 12.6 | 12.7 | 12.7 |
|        |      | 6    |      | 6    | 4    | 9    |      |      | 6    | 1    | 7    | 8    |
| NEG_A  | 0    | 1.58 | 2    | 0    | 1    | 1    | 2    | 1    | 1    | 2.81 | 1    | 1.58 |
| NEG_B  | 1    | 2    | 1    | 1.58 | 2.32 | 3.32 | 1    | 0    | 1    | 1.58 | 1    | 0    |
| NEG_C  | 2.32 | 0    | 2    | 3    | 0    | 1    | 2.58 | 2    | 2    | 3.17 | 1.58 | 1    |
| NEG_D  | 2    | 1    | 2    | 1.58 | 0    | 1.58 | 2    | 2    | 1    | 1    | 2    | 1    |
| NEG_E  | 2.58 | 2.32 | 2    | 1    | 2    | 2.32 | 2.81 | 2    | 2    | 2    | 1.58 | 2    |
| NEG_F  | 2.81 | 2.58 | 2.58 | 1.58 | 2    | 2    | 2    | 1.58 | 0    | 1.58 | 2    | 1    |
| NEG_G  | 0    | 0    | 1.58 | 1    | 0    | 1.58 | 2    | 1    | 1.58 | 0    | 2    | 1    |
| NEG_H  | 1.58 | 1    | 1    | 0    | 1.58 | 1    | 2.58 | 2    | 2    | 1    | 0    | 0    |
| POS_A  | 15.6 | 14.8 | 15.2 | 14.8 | 15.1 | 15.0 | 15.2 | 15.1 | 15.0 | 15.5 | 15.3 | 15   |
|        | 1    |      | 8    | 7    |      | 9    | 2    | 3    | 8    | 4    | 2    |      |
| POS_B  | 13.3 | 12.5 | 13.1 | 12.8 | 12.9 | 12.9 | 13.1 | 12.9 | 12.9 | 13.3 | 13.1 | 12.7 |
|        | 8    | 9    |      | 2    |      | 3    | 1    | 2    | 8    | 3    | 7    | 8    |
| POS_C  | 12.0 | 11.2 | 11.6 | 11.2 | 11.4 | 11.4 | 11.6 | 11.5 | 11.5 | 11.9 | 11.7 | 11.3 |
|        | 1    | 1    | 9    | 9    | 1    |      | 5    | 7    | 7    | 5    | 6    | 8    |
| POS_D  | 9.83 | 9.06 | 9.5  | 9.12 | 9.29 | 9.31 | 9.5  | 9.36 | 9.38 | 9.74 | 9.59 | 9.09 |
| POS_E  | 7.77 | 6.94 | 7.67 | 7.13 | 7.25 | 7.27 | 7.52 | 7.5  | 7.42 | 7.57 | 7.45 | 7.27 |
| POS_F  | 5.81 | 5.32 | 5.39 | 4.39 | 5.52 | 4.7  | 5.29 | 5.29 | 5.64 | 5.86 | 5.52 | 4.95 |



**Table S3. List of upregulated genes based on adjusted P value on WT and *TAK1*-KO cells treated with IL-1 $\beta$**

| WT IL-1 $\beta$ |             |                  | KO IL-1 $\beta$ |             |                  |
|-----------------|-------------|------------------|-----------------|-------------|------------------|
| Gene name       | Log2 change | Adjusted P value | Gene name       | Log2 change | Adjusted P value |
| IL8             | 15.38       | 0.99232          | IL8             | 11          | 0.71038          |
| TNFAIP3         | 4.66        | 0.26389          | CXCL1           | 10.23       | 0.68180          |
| CXCL6           | 12.08       | 0.31767          | OAS2            | 5.61        | 0.96867          |
| PLA2G4A         | 3.37        | 0.31403          | CXCL6           | 8.29        | 0.70850          |
| CXCL1           | 14.42       | 0.57524          | IFI44           | 4.05        | 0.25877          |
| CXCL5           | 7.99        | 0.62398          | CXCL2           | 5.47        | 0.62877          |
| IL1B            | 7.52        | 0.94249          | MX1             | 6.55        | 0.92409          |
| CCL20           | 12.14       | 0.33368          | MX2             | 5.72        | 0.96362          |
| TLR2            | 4.19        | 0.44544          |                 |             |                  |
| OAS2            | 6.59        | 0.50047          |                 |             |                  |
| CSF3            | 8.25        | 0.03063          |                 |             |                  |
| NOD2            | 6.1         | 0.67769          |                 |             |                  |
| CXCL2           | 9.62        | 0.52820          |                 |             |                  |
| IL23A           | 6.97        | 0.30641          |                 |             |                  |
| MX1             | 7.4         | 0.95689          |                 |             |                  |
| MAP2K1          | 1.11        | 0.03408          |                 |             |                  |
| OASL            | 8.05        | 0.17733          |                 |             |                  |
| IRF7            | 4.36        | 0.71755          |                 |             |                  |
| IL1RN           | 7.45        | 0.12335          |                 |             |                  |
| CSF2            | 7.07        | 0.17118          |                 |             |                  |
| IL6             | 9.43        | 0.06578          |                 |             |                  |
| IL11            | 8.5         | 0.93572          |                 |             |                  |
| IFI44           | 4.22        | 0.60764          |                 |             |                  |
| PRKCB           | 2.04        | 0.14217          |                 |             |                  |
| MX2             | 7.77        | 0.05012          |                 |             |                  |
| CXCL3           | 12.02       | 0.21715          |                 |             |                  |

|         |       |         |  |  |  |
|---------|-------|---------|--|--|--|
| C1QA    | 3.22  | 0.09298 |  |  |  |
| IFIT1   | 6.53  | 0.15728 |  |  |  |
| MAFF    | 1.23  | 0.11469 |  |  |  |
| CCL2    | 4     | 0.03094 |  |  |  |
| IL1A    | 5.45  | 0.01077 |  |  |  |
| CFB     | 4.6   | 0.67201 |  |  |  |
| PTGS2   | 6.24  | 0.39072 |  |  |  |
| C3      | 3.71  | 0.53666 |  |  |  |
| TNFSF14 | 1.74  | 0.37886 |  |  |  |
| CCR4    | 2.08  | 0.22216 |  |  |  |
| CCR3    | -2.73 | 0.15813 |  |  |  |
